# Supplementary material for: Performance Evaluation of the Newly Developed In Vitro Rapid Diagnostic Test for Detecting OXA-48-Like, KPC-, NDM-, VIM- and IMP-Type Carbapenemases: The RESIST-5 O.K.N.V.I. Multiplex Lateral Flow Assay
Source: MDPI journal article supplement (doi:10.3390/antibiotics10040460), 2021-04-19
Supplement: s1 [file s1]

Table S1. List of the isolates included in this study stratified according to the resistant genotype.

|                  | Species                  | Origin | Disk Diffusion Test (mm) |           |
|------------------|--------------------------|--------|--------------------------|-----------|
|                  |                          |        | Imipenem                 | Meropenem |
| GNSEV_NCP-CRE_1  | <i>E. coli</i>           | Wound  | 20                       | 21        |
| GNSEV_NCP-CRE_2  | <i>E. coli</i>           | Wound  | 22                       | 21        |
| GNSEV_NCP-CRE_3  | <i>K. pneumoniae</i>     | Wound  | 21                       | 20        |
| GNSEV_NCP-CRE_4  | <i>K. pneumoniae</i>     | Sputum | 19                       | 18        |
| GNSEV_NCP-CRE_5  | <i>K. pneumoniae</i>     | Wound  | 16                       | 16        |
| GNSEV_NCP-CRE_6  | <i>Enterobacter spp.</i> | Wound  | 16                       | 17        |
| GNSEV_NCP-CRE_7  | <i>K. oxytoca</i>        | Urine  | 19                       | 23        |
| GNSEV_NCP-CRE_8  | <i>C. freundii</i>       | Urine  | 22                       | 21        |
| GNSEV_NCP-CRE_9  | <i>Enterobacter spp.</i> | Wound  | 23                       | 21        |
| GNSEV_NCP-CRE_10 | <i>Enterobacter spp.</i> | Wound  | 22                       | 21        |

Table S2. Primers used in this study.

| Target                            | Primer   | Nucleotide Sequence      | Reference  |
|-----------------------------------|----------|--------------------------|------------|
| <i>bla</i> <sub>KPC</sub>         | KPC-F    | ATGTCACTGTATCGCCGTCT     | This study |
|                                   | KPC-R    | TTTTCAGAGCCTTACTGCCC     |            |
| <i>bla</i> <sub>NDM</sub>         | NDM-F    | GCCCAATATTATGCACCCGG     | 3          |
|                                   | NDM-R    | CTCATCACGATCATGCTGGC     |            |
| <i>bla</i> <sub>VIM</sub>         | VIM-2F   | ATCATGGCTATTGCGAGTCC     | 3          |
|                                   | VIM-2R   | ACGACTGAGCGATTTGTGTG     |            |
| <i>bla</i> <sub>IMP</sub>         | IMP-1F   | AAGGCGTTTATGTTTCATACTTCG | 3          |
|                                   | IMP-1R   | TTTAACCGCCTGCTCTAATGTAA  |            |
| <i>bla</i> <sub>OXA-48-like</sub> | OXA-48-F | AGCAAAGGAATGGCAAGAAA     | This study |
|                                   | OXA-48-R | TCATCAAGTTCAACCCAACC     |            |
